# Supplementary material
Source: ML conference proceedings conference paper supplement (https://openaccess.thecvf.com/content/ICCV2023/html/Cao_TexFusion_Synthesizing_3D_ICCV_2023_paper.html)
Supplement: Supplementary file 1 [file Cao_TexFusion_Synthesizing_3D_ICCV_2023_supplemental.zip]

# Supplementary Materials for *TexFusion*: Synthesizing 3D Textures with Text-Guided Image Diffusion Models

Tianshi Cao<sup>1,2,3</sup> Karsten Kreis<sup>1</sup> Sanja Fidler<sup>1,2,3</sup> Nicholas Sharp<sup>1,\*</sup> Kangxue Yin<sup>1,\*</sup>  
<sup>1</sup> NVIDIA, <sup>2</sup> University of Toronto, <sup>3</sup> Vector Institute  
 {tianshic, kkreis, sfidler, nsharp, kangxuey}@nvidia.com

## 1. Algorithm Details

**Algorithm** We present a full itinerary for the Sequential Interlaced Multiview Sampler in Algorithm 1 and a simplified block diagram in Fig. 1. The symbol  $\mathbf{I}$  denotes a matrix/tensor of ones of the appropriate size. We elaborate on our choices for the hyperparameters in the following paragraphs. For all other hyperparameters not explicitly specified below (such as the values of  $\alpha_i$ ), we follow the default settings provided in Stable Diffusion 2’s public [repository](#)<sup>1</sup>.

**Adapting DDIM schedule** We use DDIM [4] as the basis for configuring our sampler. We use the accelerated denoising process with 50 time steps, uniformly spaced. We truncate the time-step range to (300, 1000) to prevent the network from focusing too much on artifacts introduced when rendering the latent texture map into latent images. At the last denoising step  $i = 1$ , we perform sequential aggregation at the setting of  $t_{i-1} = 300$ , but additionally compute  $\mathbf{x}_0$  predictions  $\hat{\mathbf{x}}_{0,n} = \frac{\mathbf{x}_{i,n} - \sqrt{1 - \alpha_i} \epsilon_{\theta}^{t_i}(\mathbf{x}_{i,n})}{\sqrt{\alpha_i}}$  as final outputs. Following DDIM, we parameterize the noise scale of the DDIM process as  $\sigma_i = \eta \sqrt{(1 - \alpha_{i-1}) / (1 - \alpha_i)} \sqrt{1 - \alpha_i / \alpha_{i-1}}$ . To maximize the consistency of updates produced in each viewpoint, we further introduce a temperature parameter  $0 \leq \tau \leq 1$  which scales the noise term. Choosing  $\tau < 1$  reduces the variance of the posterior  $p(\mathbf{x}_{i-1} | \mathbf{x}_i)$  without effecting its expectation. In the results presented in the manuscript, we use  $\eta = 1, \tau = 0.5$  in the coarse stage, and  $\eta = 1, \tau = 0$  in the high-resolution refinement stage, which we find to be the most robust configuration.

**Classifier-free guidance** We use classifier-free guidance to control the alignment of texture to both depth and text. Specifically, we apply classifier-free guidance to both depth and text according to this formula:  $\epsilon_{\theta}^{t_i}(\mathbf{x}_{i,n}; d_n, \text{text}) = (1 - w_{\text{joint}}) \epsilon_{\theta}^{t_i}(\mathbf{x}_{i,n}) + w_{\text{joint}} \epsilon_{\theta}^{t_i}(\mathbf{x}_{i,n}; d_n, \text{text})$ . We set  $w_{\text{joint}} = 5$ , and use  $\epsilon_{\theta}^{t_i}(\mathbf{x}_{i,n})$  in place of  $\epsilon_{\theta}^{t_i}(\mathbf{x}_{i,n})$  in all experiments. We note that this formula is different from the different from that used in SD2/w-depth, which only applies classifier-free guidance to the text prompt by including

<sup>1</sup><https://github.com/Stability-AI/stablediffusion>

Sequential Interlaced Multiview Sampler

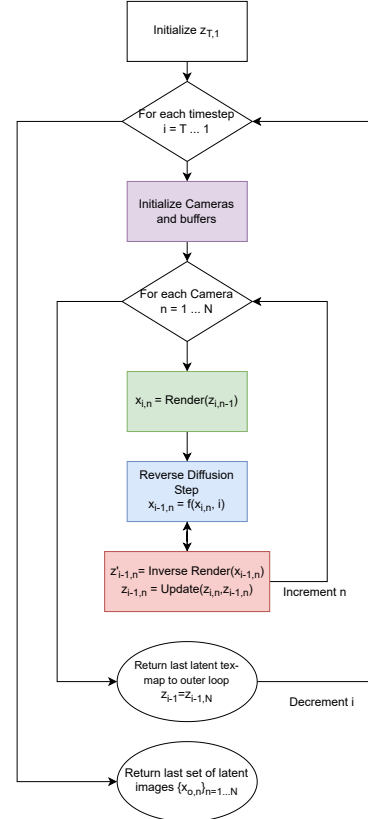

Figure 1: Simplified block diagram of SIMS.

depth conditioning in both terms on the RHS of the equation.

For human heads and bodies, we find that stronger text guidance is helpful for stylization. Thus, we add a text-condition only term as follows:  $\epsilon_{\theta}^{t_i}(\mathbf{x}_{i,n}; d_n, \text{text}) = (1 - w_{\text{joint}} - w_{\text{text}}) \epsilon_{\theta}^{t_i}(\mathbf{x}_{i,n}) + w_{\text{joint}} \epsilon_{\theta}^{t_i}(\mathbf{x}_{i,n}; d_n, \text{text}) + w_{\text{text}} \epsilon_{\theta}^{t_i}(\mathbf{x}_{i,n}; \text{text})$ . We set  $w_{\text{text}} = 3$  for these prompts.

**Additional geometry processing** We align objects with meaningful “front” to face the  $+x$  direction, and ensure all objects are placed with  $+y$  as “up”. Following [2], we augment prompts with “{prompt}, front/side/rear/top-

view” based on the location of the camera to the nearest exact direction; “top-view” is used when the elevation of the camera is above  $60^\circ$ . Perspective cameras are placed facing the origin at a fixed distance of 1.5 from the origin, and adjust the FOV to fit the object within the image. For most objects, we find that a set of nine cameras - all looking at the origin, eight spaced uniformly surrounding the object (azimuth from  $0^\circ$  to  $315^\circ$  spaced  $45^\circ$  apart, at an elevation of  $30^\circ$ ), and one camera looking down the  $-y$  direction - to work reasonable well for objects with reasonable aspect ratios and few occlusions.

In the first round of SIMS sampling, we apply  $10^\circ$  random jitters to the elevation and azimuth of each camera, and re-sample each camera for a total of 18 cameras to ensure surface coverage. In the second round, we do not apply jittering and use the fixed set of nine cameras. For human characters, the default set of nine cameras does not adequately cover the entire surface due to occlusions. We instead use 3 sets of 8 cameras: each set is placed radially looking at the  $y$  axis (azimuth from  $0^\circ$  to  $315^\circ$  spaced  $45^\circ$  apart), and a different offset is applied to the cameras’  $y$  position depending on the set (0.3, 0.0,  $-0.3$  respectively). This forms a cylinder of cameras looking at the  $y$  axis, and adequately covers all surfaces on the human character geometry.

## 2. Additional Results

### 2.1. Qualitative Results

We provide in the supplementary video multi-view renderings of all examples we show in the main paper. Further, in this document, we provide additional results of our method in Fig. 4 and Fig. 5, and comparison to two additional baselines in Fig. 2 as described in Sec. 2.2.

### 2.2. Additional Baselines

We include two additional methods for qualitative comparison. First is stable-dreamfusion [5], a community-implemented version of Dreamfusion [2] that replaces the proprietary Imagen diffusion model with Stable Diffusion 1.4. Although stable-dreamfusion is a text-to-3D method, not text-to-texture, we include it in our experiments because it is a recently released method and it illustrates the difficulty of jointly synthesizing geometry and texture. We use the default hyperparameters provided in this [repository](https://github.com/ashawkey/stable-dreamfusion)<sup>2</sup>, which performs SDS optimization for 10,000 iterations, with a classifier free guidance weight of 100. The second baseline method is the latent-painter variant of latent-nerf [1], for synthesizing textures on an input mesh. Latent-painter performs the same task as us, namely text and geometry-conditioned texture generation, but it does so using the SDS optimization, akin to [2]. We include this

<sup>2</sup><https://github.com/ashawkey/stable-dreamfusion>

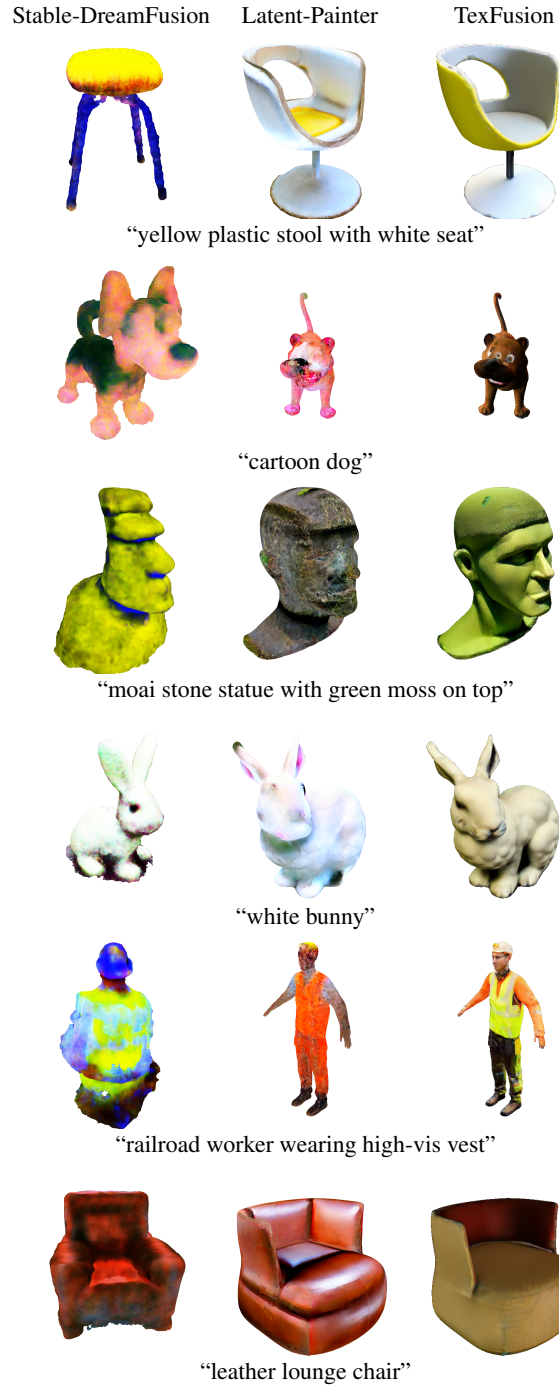

Figure 2: Visual comparison of texture generated by Stable DreamFusion (left) [5], Latent-Painter (middle) [1], and our TexFusion (right). Prompts are cherry picked for those where Stable DreamFusion successfully converged to a reasonable geometry.

method as it was recently the state-of-the-art in texture synthesis with 2D image priors. We use the default hyperparameters provided with this [repository](https://github.com/eladrich/latent-nerf)<sup>3</sup>, which performs

<sup>3</sup><https://github.com/eladrich/latent-nerf>

---

**Algorithm 1** Sequential Interlaced Multiview Sampler

---

Input: mesh  $\mathcal{M}$ , cameras  $\{C_1, \dots, C_N\}$   
Parameters: Denoising time schedule  $\{t_i\}_{i=T}^0$ , DDIM noise schedule  $\{\sigma_i\}_{i=T}^0$ , DDIM noise scale  $\eta$ , temperature  $\tau$ , function for camera jittering *maybe\_apply\_jitter*  
 $\mathbf{z}_T \sim \mathcal{N}(\mathbf{0}, \mathbf{I})$   
**for**  $i \in \{T \dots 1\}$  **do**  
  Init mask  $M_i = 0$  of shape  $(N, H, W)$   
  Init quality buffer  $Q_i = -\infty$  of shape  $(N, H, W)$   
   $\mathbf{z}_{i-1,0} = \mathbf{z}_i$   
  Apply camera jitter  $\{C_{i,1}, \dots, C_{i,N}\} = \text{maybe\_apply\_jitter}(\{C_1, \dots, C_N\})$   
  Sample forward noise  $\epsilon_i$   
  **for**  $n \in \{1 \dots N\}$  **do**  
    Compute forward diffusion term  $\mathbf{z}_{i,n} = M_i \odot \left( \sqrt{\frac{\alpha_{i-1}}{\alpha_i}} \mathbf{z}_{i-1,n-1} + \sqrt{1 - \frac{\alpha_{i-1}}{\alpha_i}} \epsilon_i \right) + (\mathbf{1} - M_i) \odot \mathbf{z}_i$   
    Render latent image and compute screen space derivatives  $\mathbf{x}'_{i,n}, (\frac{\partial \mathbf{u}}{\partial \mathbf{p}}, \frac{\partial \mathbf{v}}{\partial \mathbf{p}}, \frac{\partial \mathbf{u}}{\partial \mathbf{q}}, \frac{\partial \mathbf{v}}{\partial \mathbf{q}}) = \mathcal{R}(\mathbf{z}_{i,n}; C_{i,n})$   
     $J_{i,n} = \left| \frac{\partial \mathbf{u}}{\partial \mathbf{p}} \cdot \frac{\partial \mathbf{v}}{\partial \mathbf{q}} - \frac{\partial \mathbf{u}}{\partial \mathbf{q}} \cdot \frac{\partial \mathbf{v}}{\partial \mathbf{p}} \right|$   
    Sample  $\epsilon_{i,n} \sim \mathcal{N}(0, \mathbf{I})$   
    Perform denoising:  $\mathbf{x}_{i-1,n} = \sqrt{\alpha_{i-1}} \left( \frac{\mathbf{x}_{i,n} - \sqrt{1 - \alpha_i} \epsilon_{\theta}^{t_i}(\mathbf{x}_{i,n})}{\sqrt{\alpha_i}} \right) + \sqrt{1 - \alpha_{i-1} - \sigma_i^2} \cdot \epsilon_{\theta}^{t_i}(\mathbf{x}_{i,n}) + \tau \cdot \sigma_i \cdot \epsilon_{i,n}$   
    **if**  $i = 1$  **then**  
       $\mathbf{x}_0$  prediction:  $\hat{\mathbf{x}}_{0,n} = \frac{\mathbf{x}_{i,n} - \sqrt{1 - \alpha_i} \epsilon_{\theta}^{t_i}(\mathbf{x}_{i,n})}{\sqrt{\alpha_i}}$   
    **end if**  
     $\mathbf{z}'_{i-1,n} = \mathcal{R}^{-1}(\mathbf{x}_{i-1,n}; C_{i,n})$   
     $Q_{i,n} = \mathcal{R}^{-1}(-J_{i-1,n}; C_{i,n})$   
     $M_{i,n} = \mathcal{R}^{-1}(\mathbf{I}(\mathbf{x}_{i-1,n}); C_{i,n})$   
    Determine update area  $U = M_{i,n}(u, v) > 0$ , and  $Q_{i,n} > Q_i$   
    Update pixels  $\mathbf{z}_{i-1,n} = U \odot \mathbf{z}'_{i-1,n} + (1 - U) \odot \mathbf{z}_{i-1,n}$   
    Update mask and quality buffer  $M_i = \max(M_i, M_{i,n})$ ,  $Q_i = \max(Q_i, Q_{i,n})$  (max is applied element-wise)  
  **end for**  
   $\mathbf{z}_{i-1} = \mathbf{z}_{i-1,N}$   
**end for**  
**return**  $\{\hat{\mathbf{x}}_{0,n}\}_{n=1}^N$ 

---

5,000 iterations of SDS optimization, also with a classifier free guidance weight of 100.

Results from these two baselines, along with results from TexFusion on the same prompts, can be found in Fig. 2. Stable DreamFusion failed to converge at all for most prompts in our dataset (e.g. Fig. 3), so we selected prompts where Stable DreamFusion did produce reasonable geometry for visualization. This outcome highlights the fragility of optimizing 3D geometry and texture jointly. We find that Latent-Painter often produced over-saturated colors in the texture due to the use of the SDS optimization with high guidance weights. Furthermore, we find significant artifacts in Latent-Painter results that are reminiscent of incorrect UV mapping. This artifact is in fact due to Latent-Painter applying Stable Diffusion’s decoder to the latent texture map directly in texture space, thereby creating artifacts at all boundaries of UV islands. Our method does not suffer from the same issue because we apply the decoder to multi-

view latent images, making our method agnostic to the underlying UV parameterization.

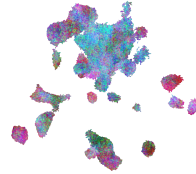

Figure 3: Example result of Stable-DreamFusion where the geometry did not converge properly. Prompt is “ambulance, white paint with red accents”.

### 2.3. Runtime Comparison

We compare the runtime of TexFusion to baselines running on a workstation with a single NVIDIA RTX A6000

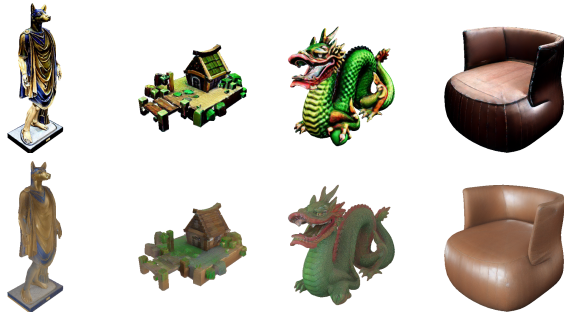

Figure 4: Top: TexFusion + ControlNet in “guess mode”; bottom: TexFusion + ControlNet in “normal mode”.

| Method                     | Runtime |
|----------------------------|---------|
| stable-dreamfusion         | 39 min  |
| Latent Painter             | 22 min  |
| TEXTure (reported in [3])  | 5 min   |
| TEXTure (ran on our setup) | 2.9 min |
| TexFusion (24 cameras)     | 6.2 min |
| TexFusion (9 cameras)      | 2.2 min |

Table 1: Runtime comparison: wall clock time elapsed to synthesize one sample

GPU in Tab. 1. We separately measure the runtime of our method under two different camera configurations (see Appendix Section 1 for details of the camera configuration). We find TexFusion to be an order of magnitude faster than methods that rely on optimizing a neural representation with SDS (17.7x w.r.t stable-dreamfusion and 10x w.r.t. Latent Painter). Our runtime is similar to the concurrent work of TEXTure (2.9 min), whose runtime falls between the 9 camera configuration of our method (2.2 min) and 24 camera configuration of our method (6.2 min). Of the 2.2 min duration, 76 seconds are spent on the first round of SIMS, 22 s on the second round, and 34 s on optimizing the neural color field.

### 3. Experiment details

#### 3.1. User study details

We conduct a user study using Amazon Mechanical Turk <https://www.mturk.com/>. We ask each survey participant to look at one pair of texturing results generated by TEXTure and TexFusion according to the same prompt, displayed side-by-side in random left-right order, and answer four questions. For each prompt, we show the survey to 3 participants. We then aggregate the results over all responses. A screenshot of one such survey is shown in Fig. 6.

#### 3.2. Dataset description

We collect 35 meshes from various sources. A complete list can be found in Tab. 2 and Tab. 3. Objects from

shapenet are selected from ShapeNetCore.v1, obtained under the [ShapeNet license](https://shapenet.org/terms)<sup>4</sup>. One Human model is obtained from Text2Mesh [repository](https://github.com/threedle/text2mesh/tree/main/data/source_meshes)<sup>5</sup>. Objects “house” and “casa” are obtained for free from Turbosquid with permissive licensing. “bunny” and “dragon” are obtained from [Stanford 3D scans](http://graphics.stanford.edu/data/3Dscanrep/)<sup>6</sup>. “Hermanubis” and “Provost” are obtained from [3D scans](https://threedscans.com/)<sup>7</sup>, which are shared freely without copyright restrictions. All other objects are obtained under appropriate commercial licenses.

<sup>4</sup><https://shapenet.org/terms>

<sup>5</sup>[https://github.com/threedle/text2mesh/tree/main/data/source\\_meshes](https://github.com/threedle/text2mesh/tree/main/data/source_meshes)

<sup>6</sup><http://graphics.stanford.edu/data/3Dscanrep/>

<sup>7</sup><https://threedscans.com/>



| Object                           | Source    | Description   | Prompts                                                                                                                                                                                                              |
|----------------------------------|-----------|---------------|----------------------------------------------------------------------------------------------------------------------------------------------------------------------------------------------------------------------|
| 1a64bf1e658652ddb11647ffa4306609 | shapenet  | SUV           | “lamborghini urus”<br>“pink porsche cayenne”<br>“white mercedes benz SUV”<br>“green ambulance with red cross”                                                                                                        |
| 1a7b9697be903334b99755e16c4a9d21 | shapenet  | coupe         | “silver porsche 911”<br>“blue bmw m5 with white stripes”<br>“red ferrari with orange headlights”<br>“beautiful yellow sports car”                                                                                    |
| 1a48d03a977a6f0aeda0253452893d75 | shapenet  | pickup truck  | “black pickup truck”<br>“old toyota pickup truck”<br>“red pickup truck with black trunk”                                                                                                                             |
| 133c16fc6ca7d77676bb31db0358e9c6 | shapenet  | luggage box   | “blue luggage box”<br>“black luggage with a yellow smiley face”                                                                                                                                                      |
| 1b9ef45fefefa35ed13f430b2941481  | shapenet  | handbag       | “white handbag”<br>“turquoise blue handbag”<br>“black handbag with gold trims”                                                                                                                                       |
| 54cd45b275f551b276bb31db0358e9c6 | shapenet  | backpack      | “red backpack”<br>“camper bag, camouflage”<br>“black backpack with red accents”                                                                                                                                      |
| e49f6ae8fa76e90a285e5a1f74237618 | shapenet  | handbag       | “crocodile skin handbag”<br>“blue handbag with silver trims”<br>“linen fabric handbag”                                                                                                                               |
| 2c6815654a9d4c2aa3f600c356573d21 | shapenet  | lounge chair  | “leather lounge chair”<br>“red velvet lounge chair”                                                                                                                                                                  |
| 2fa970b5c40fbfb95117ae083a7e54ea | shapenet  | two-seat sofa | “soft pearl fabric sofa”<br>“modern building in the shape of a sofa”                                                                                                                                                 |
| 5bfee410a492af4f65ba78ad9601cf1b | shapenet  | bar stool     | “yellow plastic stool with white seat”<br>“silver metallic stool”                                                                                                                                                    |
| 97cd4ed02e022ce7174150bd56e389a8 | shapenet  | dinning chair | “wooden dinning chair with leather seat”<br>“cast iron dinning chair”                                                                                                                                                |
| 5b04b836924fe955dab8f5f5224d1d8a | shapenet  | bus           | “yellow school bus”                                                                                                                                                                                                  |
| 7fc729def80e5ef696a0b8543dac6097 | shapenet  | taxi sedan    | “new york taxi, yellow cab”<br>“taxi from tokyo, black toyota crown”                                                                                                                                                 |
| 85a8ee0ef94161b049d69f6eaea5d368 | shapenet  | van           | “green ambulance with red cross”<br>“ambulance, white paint with red accents”<br>“pink van with blue top”                                                                                                            |
| a3d77c6b58ea6e75e4b68d3b17c43658 | shapenet  | beetle        | “old and rusty volkswagon beetle”<br>“red volkswagon beetle, cartoon style”                                                                                                                                          |
| b4a86e6b096bb93eb7727d322e44e79b | shapenet  | pickup truck  | “classic red farm truck”<br>“farm truck from cars movie, brown, rusty”                                                                                                                                               |
| fc86bf465674ec8b7c3c6f82a395b347 | shapenet  | sports car    | “batmobile”<br>“blue bugatti chiron”                                                                                                                                                                                 |
| person                           | Text2Mesh | Human model   | “white humanoid robot, movie poster,<br>main character of a science fiction movie”<br>“comic book superhero, red body suit”<br>“white humanoid robot, movie poster,<br>villain character of a science fiction movie” |

Table 2: Description of all geometries used in our dataset, (continued in Tab. 3)

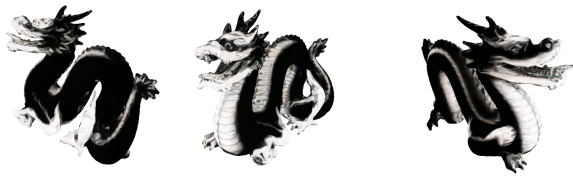

“black and white dragon in chinese ink art style”

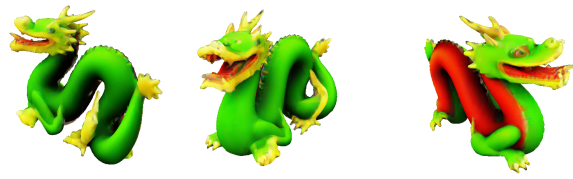

“cartoon dragon, red and green”

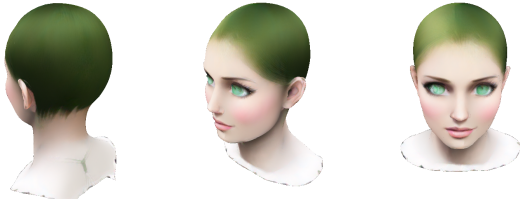

“blonde girl with green eyes, hair in a tied bun, anime illustration, portrait”

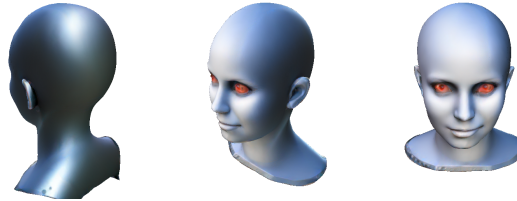

“Portrait of a humanoid robot, futuristic, science fiction”

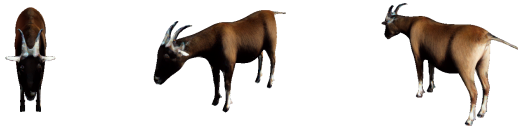

“brown mountain goat”

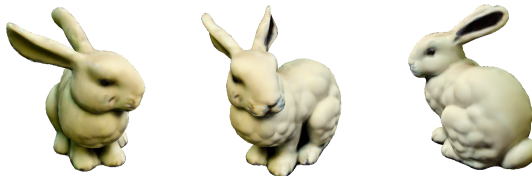

“white bunny”

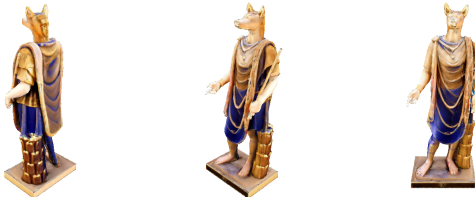

“portrait of greek-egyptian deity hermanubis, lapis skin and gold clothing”

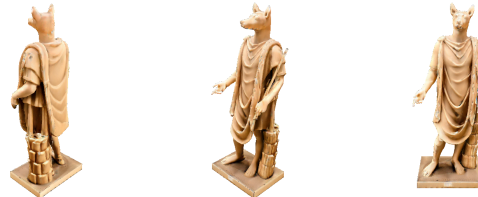

“sandstone statue of hermanubis”

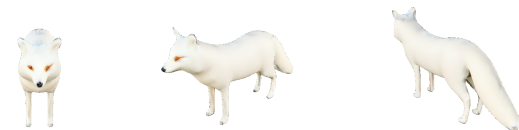

“white fox”

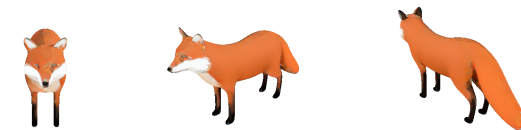

“cartoon fox”

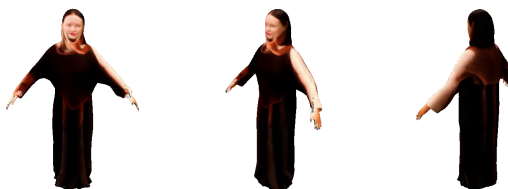

“nunn in a black dress”

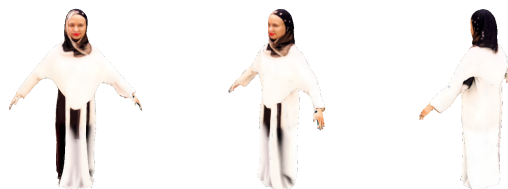

“nunn in a white dress, black headscarf”

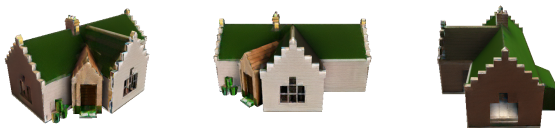

“minecraft house, bricks, rock, grass, stone”

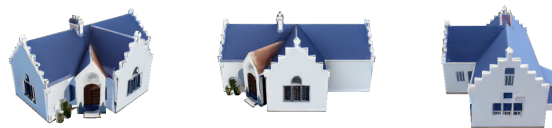

“colonial style house, white walls, blue ceiling”

Figure 5: Gallery of meshes textured by TexFusion .

| Object                       | Source            | Description      | Prompts                                                                                                                                                                                                                  |
|------------------------------|-------------------|------------------|--------------------------------------------------------------------------------------------------------------------------------------------------------------------------------------------------------------------------|
| rp_alvin_rigged_003_MAYA     | Renderpeople      | Human model      | “person wearing black shirt and white pants”<br>“person wearing white t-shirt with a peace sign”                                                                                                                         |
| rp_alexandra_rigged_004_MAYA | Renderpeople      | Human model      | “person in red sweater, blue jeans”<br>“person in white sweater with a red logo, yoga pants”                                                                                                                             |
| rp_adanna_rigged_007_MAYA    | Renderpeople      | Human model      | “nunn in a black dress”<br>“nunn in a white dress, black headscarf”                                                                                                                                                      |
| rp_aaron_rigged_001_MAYA     | Renderpeople      | Human model      | “railroad worker wearing high-vis vest”<br>“biker wearing red jacket and black pants”                                                                                                                                    |
| Age49-LoganWade              | Tripleganger      | Human head       | “oil painting of a bald, middle aged banker with pointed moustache”<br>“moai stone statue with green moss on top”<br>“portrait photo of abraham lincoln, full color”                                                     |
| Age26-AngelicaCollins        | Tripleganger      | Human head       | “Portrait of a humanoid robot, futuristic, science fiction”<br>“blonde girl with green eyes, hair in tied a bun, anime illustration, portrait”<br>“blonde girl with green eyes, hair in tied a bun, DSLR portrait photo” |
| house                        | Turbosquid        | Medieval house   | “medieval celtic House, stone bricks, wooden roof”<br>“minecraft house, bricks, rock, grass, stone”<br>“colonial style house, white walls, blue ceiling”                                                                 |
| casa                         | Turbosquid        | house in the sea | “white house by the dock, green ceiling, cartoon style”<br>“minecraft house, bricks, rock, grass, stone”<br>“white house by the dock, green ceiling, impressionist painting”                                             |
| 1073771                      | Turbosquid        | rabbit           | “brown rabbit”<br>“purple rabbit”<br>“tiger with yellow and black stripes”                                                                                                                                               |
| 1106184                      | Turbosquid        | cartoon dog      | “cartoon dog”<br>“lion dance, red and green”<br>“brown bull dog”                                                                                                                                                         |
| 1117733                      | Turbosquid        | goat             | “brown mountain goat”<br>“black goat with white hoofs”<br>“milk cow”                                                                                                                                                     |
| 1281334                      | Turbosquid        | cartoon cow      | “cartoon milk cow”<br>“giant panda”                                                                                                                                                                                      |
| 1367642                      | Turbosquid        | cartoon fox      | “cartoon fox”<br>“brown wiener dog”<br>“white fox”                                                                                                                                                                       |
| bunny                        | Stanford 3D Scans | bunny            | “white bunny”                                                                                                                                                                                                            |
| dragon                       | Stanford 3D Scans | dragon           | “black and white dragon in chinese ink art style”<br>“cartoon dragon, red and green”                                                                                                                                     |
| Hermanubis                   | 3D scans          | statue           | “sandstone statue of hermanubis”<br>“portrait of greek-egyptian deity hermanubis, lapis skin and gold clothing”                                                                                                          |
| Provost                      | 3D scans          | statue           | “portrait of Provost, oil paint”<br>“marble statue of Provost”                                                                                                                                                           |

Table 3: Description of all geometries used in our dataset continued.

## References

- [1] Gal Metzer, Elad Richardson, Or Patashnik, Raja Giryes, and Daniel Cohen-Or. Latent-nerf for shape-guided generation of 3d shapes and textures. *arXiv preprint arXiv:2211.07600*, 2022. 2
- [2] Ben Poole, Ajay Jain, Jonathan T. Barron, and Ben Mildenhall. Dreamfusion: Text-to-3d using 2d diffusion. *arXiv*, 2022. 1, 2
- [3] Elad Richardson, Gal Metzer, Yuval Alaluf, Raja Giryes, and Daniel Cohen-Or. Texture: Text-guided texturing of 3d shapes. *arXiv preprint arXiv:2302.01721*, 2023. 4
- [4] Jiaming Song, Chenlin Meng, and Stefano Ermon. Denoising diffusion implicit models. In *International Conference on Learning Representations*, 2021. 1

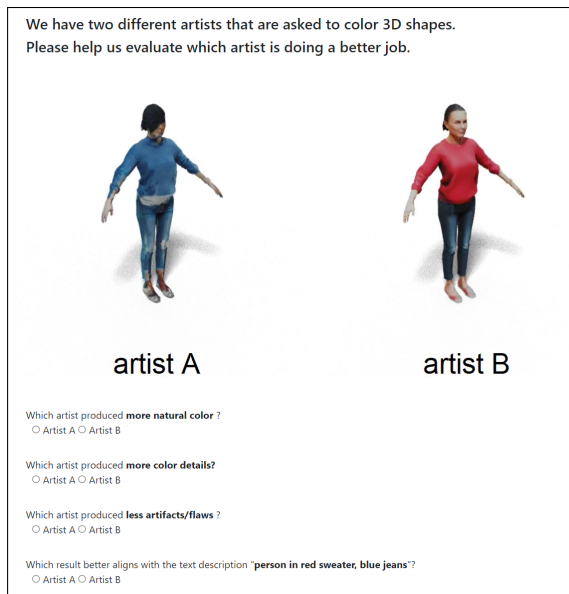

Figure 6: Screenshot of example user study screen

- [5] Jiaxiang Tang. Stable-dreamfusion: Text-to-3d with stable-diffusion, 2022. <https://github.com/ashawkey/stable-dreamfusion>. 2
